# Supplementary material
Source: PubMed Central journal article supplement (PMC10958317)
Supplement: tc-2022-057697supp001.pdf [file tc-2022-057697supp001.pdf]

## SUPPLEMENTARY MATERIALS

**Supplementary Table 1.** Percentage of smokers who reported they made their last purchase of cigarettes from a First Nations reserve before and after the menthol ban.

| Cigarette purchasing group                                                                 | Smokers who reported last purchase of cigarettes from a First Nations reserve before menthol ban<br>% (n) | Smokers who reported last purchase of cigarettes from a First Nations reserve after menthol ban<br>% (n) | p-value |
|--------------------------------------------------------------------------------------------|-----------------------------------------------------------------------------------------------------------|----------------------------------------------------------------------------------------------------------|---------|
| Purchased menthol cigarettes at both pre- and post-ban<br>(n=9 menthol smokers)            | 51.2 (4)                                                                                                  | 51.2 (4)                                                                                                 | 1.00    |
| Purchased non-menthol cigarettes at both pre- and post-ban<br>(n=1024 non-menthol smokers) | 9.1 (100)                                                                                                 | 8.7 (101)                                                                                                | 0.69    |
| Purchased cigarettes at both pre- and post-ban<br>(n=1086 menthol + non-menthol smokers)   | 9.7 (112)                                                                                                 | 9.2 (112)                                                                                                | 0.56    |

Tested for pre-post ban changes in purchasing of cigarettes from First Nations among the same groups of: a) **menthol smokers** who purchased **menthol cigarettes** at pre- and post-ban, b) **non-menthol smokers** who purchased **non-menthol cigarettes** at pre- and post-ban, and c) **all smokers** (menthol + non-menthol) who purchased **menthol and non-menthol cigarettes** at pre- and post-ban.

Percent values are weighted estimates that do not correspond exactly with reported sample sizes.
