# Supplementary material
Source: PubMed Central journal article supplement (PMC10958317)
Supplement: tc-2022-057697supp002.pdf [file tc-2022-057697supp002.pdf]

## SUPPLEMENTARY MATERIALS

**Supplementary Table 2.** Cigarette purchasing from First Nations reserves by Indigenous smokers and non-Indigenous smokers before and after the menthol ban.

| Type of cigarette purchase                                                                                 | Time of cigarette purchase                                                                                                                   | Purchased cigarettes from a First Nations reserve |                         |                                                        |
|------------------------------------------------------------------------------------------------------------|----------------------------------------------------------------------------------------------------------------------------------------------|---------------------------------------------------|-------------------------|--------------------------------------------------------|
|                                                                                                            |                                                                                                                                              | Indigenous<br>% (n)                               | Non-Indigenous<br>% (n) | Indigenous vs.<br>non-Indigenous<br>comparison p-value |
| Menthol cigarette purchase, among those who purchased menthol cigarettes at both pre- and post-ban         | Pre-ban                                                                                                                                      | 0 (0)                                             | 51.2% (9)               | -                                                      |
|                                                                                                            | Post-ban                                                                                                                                     | 0 (0)                                             | 51.2% (9)               | -                                                      |
|                                                                                                            | Pre- and post-ban difference between Indigenous and non-Indigenous smokers who purchased menthol cigarettes from a First Nations reserve     | -                                                 |                         |                                                        |
| Non-menthol cigarette purchase, among those who purchased non-menthol cigarettes at both pre- and post-ban | Pre-ban                                                                                                                                      | 13.4 (35)                                         | 9.0 (1024)              | 0.38                                                   |
|                                                                                                            | Post-ban                                                                                                                                     | 23.3 (35)                                         | 8.4 (1024)              | 0.05                                                   |
|                                                                                                            | Pre- and post-ban difference between Indigenous and non-Indigenous smokers who purchased non-menthol cigarettes from a First Nations reserve | 11%, p= 0.09                                      |                         |                                                        |
| All cigarette purchase, among those who purchased cigarettes at both pre- and post ban                     | Pre-ban                                                                                                                                      | 21.9 (37)                                         | 9.4 (1041)              | 0.10                                                   |
|                                                                                                            | Post-ban                                                                                                                                     | 26.3 (37)                                         | 8.8 (1041)              | 0.03                                                   |
|                                                                                                            | Pre- and post-ban difference between Indigenous and non-Indigenous smokers who purchased cigarettes from a First Nations reserve             | 5%, p=0.50                                        |                         |                                                        |

Generalized estimating equation (GEE) regression models adjusted for sex, age group, and time-in-sample.
